# Supplementary material
Source: Springer Nature journal article supplement (https://www.springermedizin.de/resource/supplementary/12974_2010_285_MOESM5_ESM.pdf/9601166)

**A**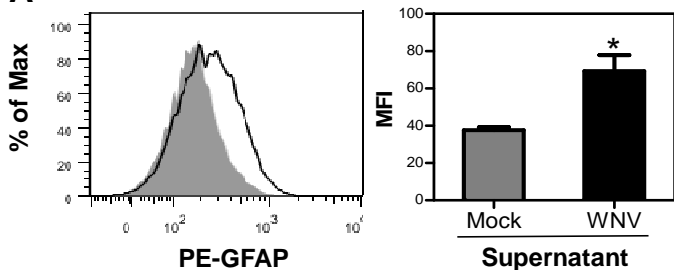**B**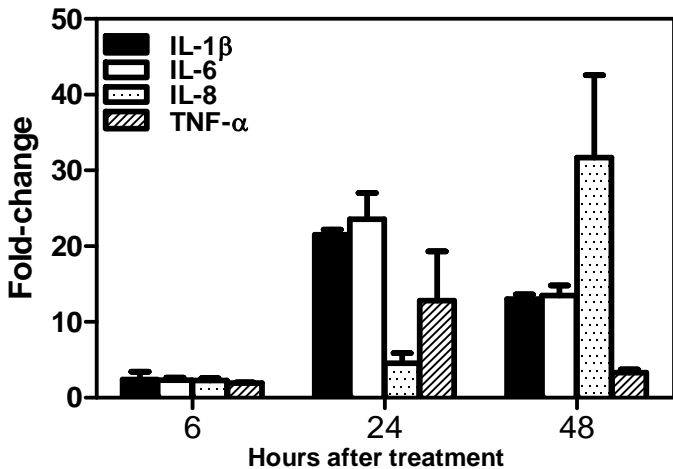

Supplement: MOESM5 [file 9601166]
